# Supplementary material for: Induction of Innate Immune Response by TLR3 Agonist Protects Mice against SARS-CoV-2 Infection
Source: MDPI journal article supplement (doi:10.3390/v14020189), 2022-01-19

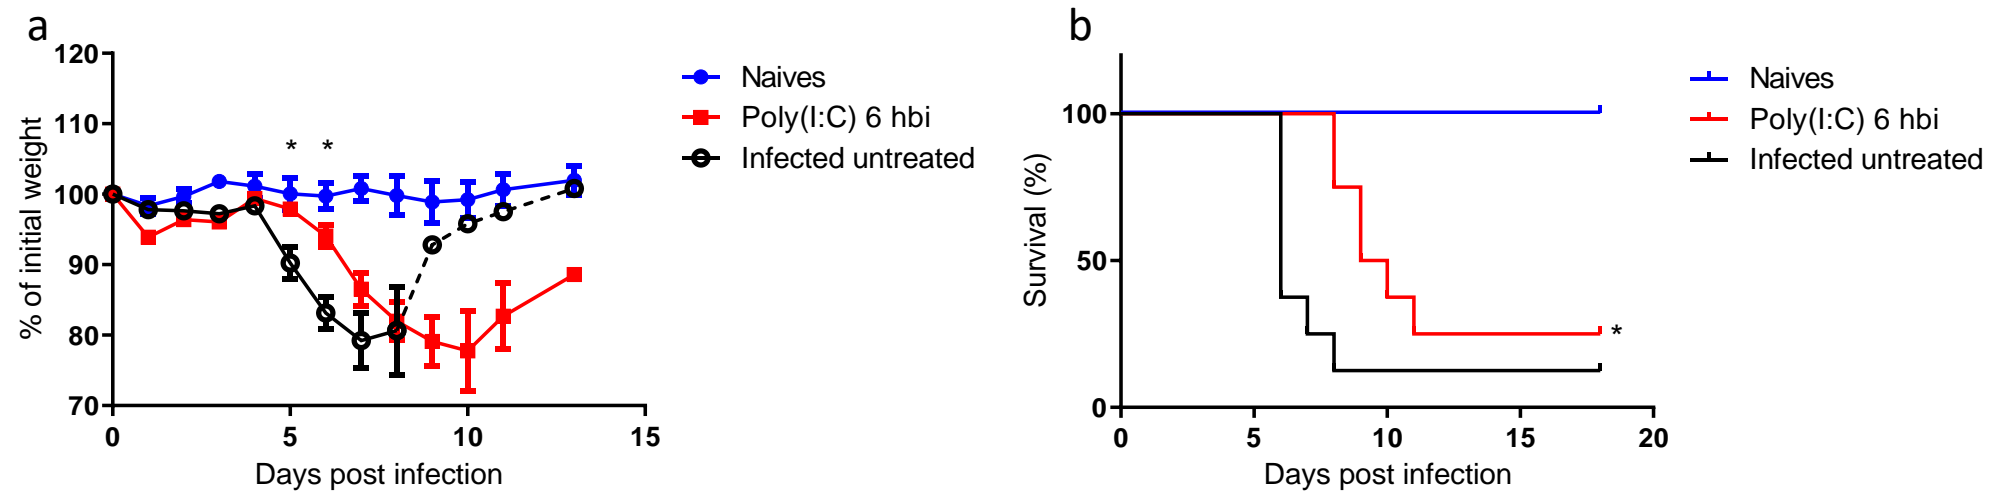

**Figure S1.** Prophylactic effect of Poly(I:C) following SARS-CoV-2 infection. Body weight changes (a) and mortality (b) of K18-hACE2 mice treated with 1.5mg/kg (i.n.) of Poly(I:C) 6 hours before infection with SARS-CoV-2 (500 PFU i.n.). Number of animals per group: naive n=3, Poly(I:C) 6 hbi n=9, Infected untreated n=9. Statistical significance was determined using the Holm-Sidak method as compared to infected untreated group \* $p < 0.005$  (a) or Mantel-Cox test \* $p < 0.05$ .

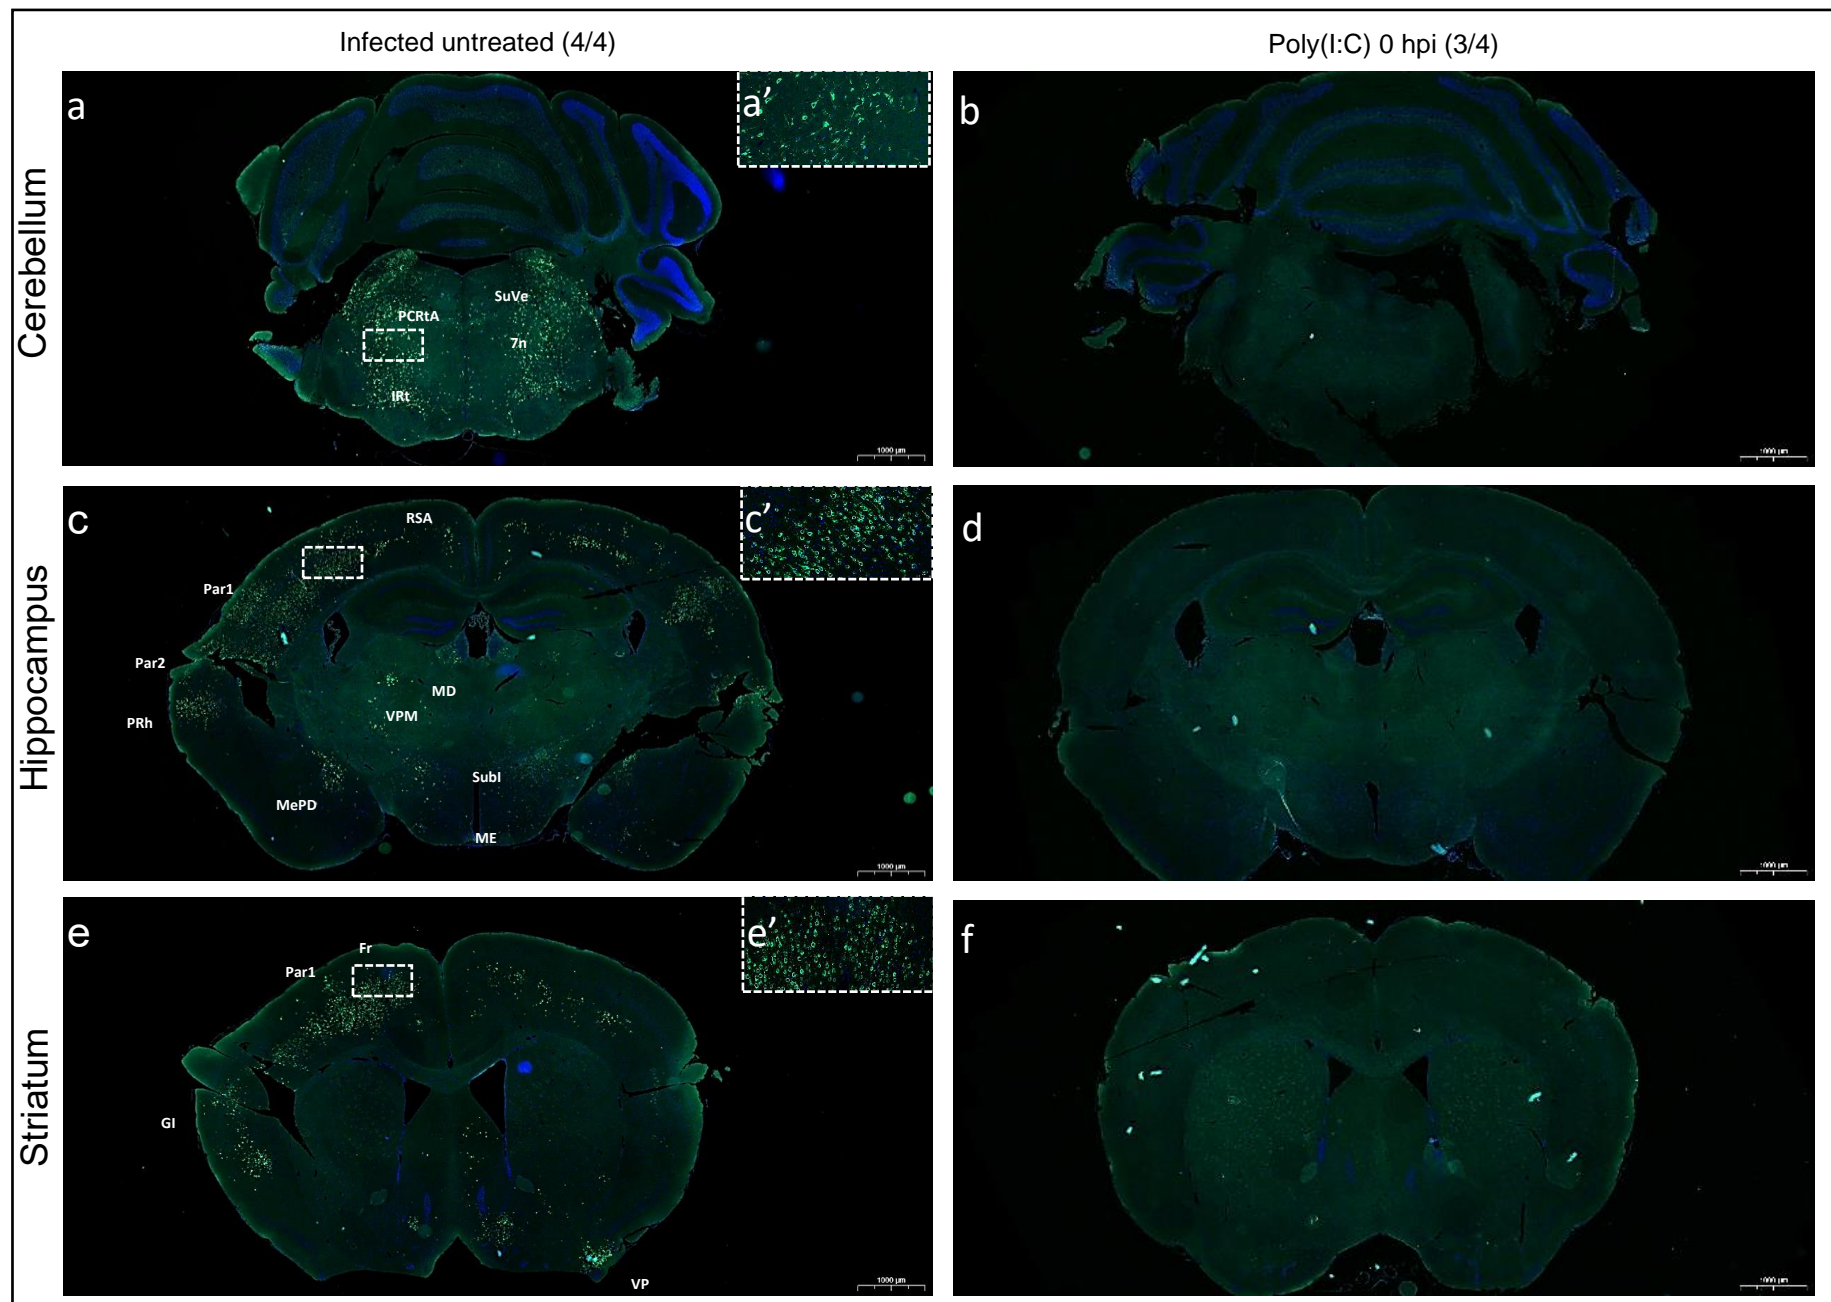

**Figure S2.** Histopathological brain analysis following Poly(I:C) treatment. SARS-CoV-2 immunolabeling of infected untreated and Poly(I:C) 0 hpi treated mice brains at 5 dpi. Brains were isolated and processed for paraffin embedding from infected untreated (**a, c, e**) and Poly(I:C) 0 hpi treated groups (**b, d, f**). Scale bar= 1000µm. n=4 per group. PCRtA - parvocellular reticular nucleus alpha; IRt – intermediate reticular nucleus; SuVe – superior vestibular nucleus; VPM – ventral posteromedial thalamic nucleus; MePD – Medial amygdala nucleus posterodorsal; MD – mediodorsal thalamic nucleus. ME – median eminence; SuBI – Subincertal nucleus; PRh – perirhinal cortex; RSA – Retrosplenial agranular cortex; Par1 – parietal cortex area 1; Par2 – parietal cortex area 2; FR – frontal cortex; GI – Granular insular cortex; VP – ventral pallidum. **a', c'** and **e'** are enlargements of the boxes in a, c and e, respectively.

**Table S1.** Synergistic effect of Poly(I:C) in SARS-CoV-2 infected mice. The synergistic values of 44 inflammatory related genes of Poly(I:C) treated and infected mice lungs were calculated. Genes are considered synergistically elevated when the value is  $\geq 1.2$ . Color scale bar indicating the fold change magnitude appears on the right.

| Cytokines     |     |
|---------------|-----|
| IFN $\alpha$  | 0.4 |
| IFN $\beta$ 1 | 0.4 |
| IFN $\gamma$  | 2.1 |
| IL-1 $\alpha$ | 1.4 |
| IL-1 $\beta$  | 4.6 |
| IL-4          | 0.2 |
| IL-6          | 1.3 |
| TGF $\beta$ 1 | 1.6 |
| TNF $\alpha$  | 3.7 |

| Chemokines |     |
|------------|-----|
| CCL12      | 1.0 |
| CCL5       | 2.5 |
| CCL8       | 0.8 |
| CXCL10     | 1.8 |

| Complement |     |
|------------|-----|
| C1rb, C1ra | 2.0 |
| C1s1       | 1.5 |
| C3         | 1.9 |

| Metalloproteases |     |
|------------------|-----|
| MMP3             | 1.8 |
| MMP8             | 4.5 |
| MMP9             | 1.3 |
| TIMP1            | 1.4 |

| Antigen presentation |     |
|----------------------|-----|
| H2-EB1               | 1.5 |
| H2-K1                | 2.1 |

| Interferon related |     |
|--------------------|-----|
| Ifi27l2a           | 1.6 |
| Ifi44              | 2.4 |
| IFIT1              | 3.0 |
| IFIT3              | 0.6 |
| IRF7               | 1.7 |
| Isg15              | 1.3 |
| STAT1              | 2.0 |

| Costimulatory receptors |     |
|-------------------------|-----|
| CD2                     | 1.6 |
| CD27                    | 2.1 |
| CD3e                    | 2.3 |
| CD3g                    | 1.6 |
| CD4                     | 2.2 |
| CD38                    | 1.5 |
| CD40                    | 1.5 |
| CD80                    | 2.4 |
| CD8a                    | 2.1 |

| Cell death  |     |
|-------------|-----|
| FAS         | 0.9 |
| <u>FASL</u> | 1.5 |
| Gzma        | 0.9 |
| Gzmb        | 0.9 |
| PRF1        | 0.8 |
| Zbp1        | 3.9 |

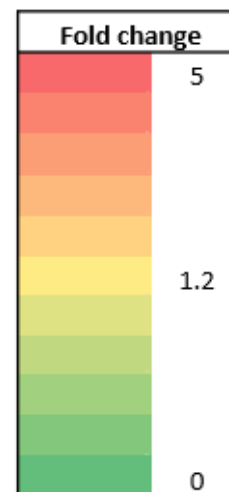

Supplement: s1 [file s1]
